# Supplementary material
Source: publisher figshare collection journal article supplement (https://karger.figshare.com/ndownloader/files/28271961)
Supplement: Supplementary file 1 [file 28271961]

**Supplementary Materials**


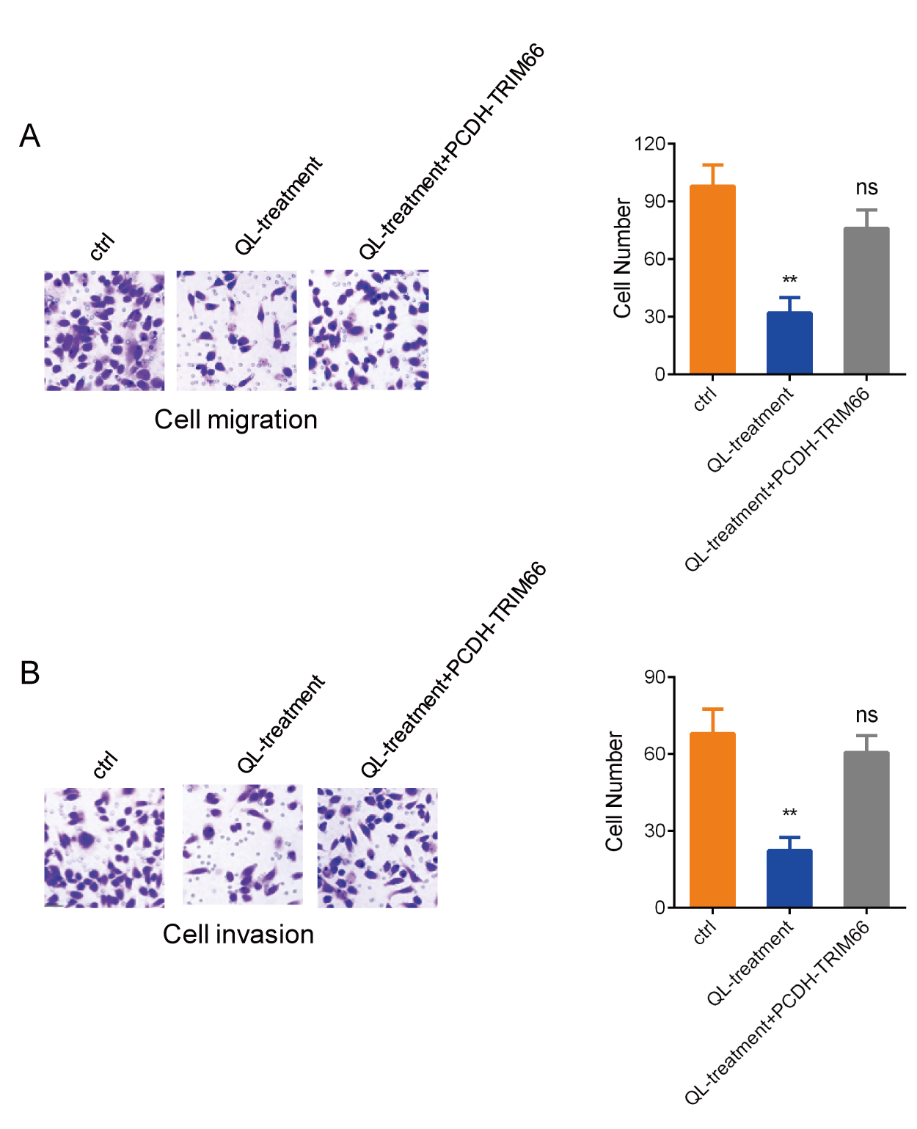


Figure S1. Cell migration and infiltration of the three indicated groups. (A) Representative images and statistical data for the cell migration. (B) Representative images and statistical data for the cell invasion. Data were presented as mean ± SD. **p<0.01; ns, no significance.
